REFERENCE

1. Hurford WE, Alfille PH, Bailin MT, Behringer E, Cullen DJ, Haspel K, Wilson RS, Zapol WM: Placement and complications of

double-lumen endotracheal tubes (abstract). *Anesth Analg*, in press

(Accepted for publication January 24, 1992.)

Anesthesiology  
76:863-864, 1992

## $\beta$ -Adrenergic Receptor Number in Surgically Denervated, Transplanted Human Hearts

*To the Editor:*—Cardiac  $\beta_1$ - and  $\beta_2$ -adrenoceptors mediate positive inotropic and chronotropic effects of catecholamines.<sup>1</sup> The transplanted human heart seems to be denervated for at least as long as 5 yr after transplantation, as evidenced by reduced tissue norepinephrine levels<sup>2</sup> and nerve density.<sup>3</sup> Recently, an increased response of the transplanted human heart to  $\beta$ -adrenergic stimulation has been reported.<sup>4</sup> Thus, it is conceivable that supersensitivity to  $\beta$ -adrenergic stimulation could be due to an up-regulation of  $\beta$ -adrenoceptor number. As yet, nothing is known about changes in total  $\beta$ -adrenoceptor density and  $\beta_1$ - and  $\beta_2$ -subtype distribution during long-term follow-up in these transplanted human hearts and about the relationship to the pretransplantation disease.

The present study was carried out to examine total  $\beta$ -adrenoceptor density and  $\beta_1$ - and  $\beta_2$ -subtype distribution in right ventricular biopsies taken from 100 patients (mean age  $43.4 \pm 5.8$  [30–61] yr) 1–60 months after orthotopic heart transplantation and from eight prospective transplant donors (mean age  $40.1 \pm 3.8$  [27–53] yr, death due to cerebral hemorrhage) who served as controls and whose hearts could not be transplanted for surgical reasons or immunologic incompatibility. Written informed consent and approval by the Ethical Committees of the University of Hamburg were obtained. Patients had received a heart transplant because of end-stage dilated cardiomyopathy ( $n = 65$ ) or severe ischemic heart disease ( $n = 35$ ), and they revealed normal cardiac function after transplantation, as evidenced by cardiac catheterization and echocardiogram. For rejection screening, biopsies were analyzed and classified according to the Hannover Classification.<sup>5</sup> Patients were clinically stable and without histologic evidence of rejection (A3/A4). Plasma catecholamine levels were within normal limits (norepinephrine  $< 500$  ng/l) and epinephrine  $< 100$  ng/l). Chronic immunosuppressive therapy consisted of cyclosporine A, azathioprine, and prednisone. Additional medication consisted of low-dose captopril, calcium antagonists, and diuretics.

Cardiac crude membranes were prepared as recently described by Steinfath *et al.*<sup>6</sup> Briefly, right ventricular endomyocardial biopsies (8–12 mg) were homogenized for 10 s and  $2 \times 20$  s in ice-cold 1 mM  $\text{KHCO}_3$  with a Polytron homogenizer (PT 10–35 Kinematica, Luzern, Switzerland). Homogenates were centrifuged at  $50,000 \times g$  for 20 min at  $4^\circ \text{C}$ . Pellets were resuspended in 10 mM Tris-HCl, 154 mM NaCl buffer, pH 7.4, containing 0.55 mM ascorbic acid and were homogenized for 10 s. For determination of the total number of  $\beta$ -adrenoceptors, membranes were incubated with five different concentrations of the nonselective  $\beta$ -adrenoceptor antagonist (–)-(125 I)-iodocyanopindolol (ICYP, specific activity 2,200 Ci/mmol, New England Nuclear, Dreieich, Germany) ranging from 8 to 200 pM for 1 h at  $37^\circ \text{C}$ . Nonspecific binding of ICYP was defined as binding to membranes that was not displaced by a high concentration of the nonselective  $\beta$ -adrenoceptor antagonist ( $\pm$ )-CGP 12177 (1  $\mu\text{M}$ , 4-[3-tertiarybutylamino-2-hydroxypropoxy]-benzimidazole-2-on). Specific binding was defined as total binding minus nonspecific binding, which amounted

to 70–80% at 100 pM of ICYP. To determine the relative amount of  $\beta_1$ - and  $\beta_2$ -adrenoceptors, membranes were incubated with ICYP (100 pM) in the presence of the highly selective  $\beta_1$ -adrenoceptor antagonist CGP 20712 A (300 nM; 1-[2-(3-carbamoyl-4-hydroxy)phenoxy ethylamino]-3-[4-(1-methyl-4-trifluoromethyl-2-imidazolyl)phenoxy]-2-propanol methanesulfonate). The  $\beta_2$ -subtype population was calculated as total  $\beta$ -adrenoceptor number minus  $\beta_1$ -subtype population. Both CGP 12177 and CGP 20712A were gifts from Ciba Geigy, Basel, Switzerland. Protein concentrations were determined by Bio-Rad Protein Assay according to Bradford.<sup>7</sup> Bovine  $\gamma$  globulin was used as protein standard.

Data are expressed as arithmetic means  $\pm$  SEM. The equilibrium dissociation constant and the maximal number of binding sites were calculated from plots according to Scatchard<sup>8</sup> and were compared with those calculated by the computer program GraphPAD InPlot (GraphPAD Software, San Diego, CA). The two methods yielded identical results. Significant differences between means were estimated by Student's *t* test for unpaired observations and analysis of variance, respectively. The relation between two variables was assessed by linear regression analysis. A *P* value of less than 0.05 was considered significant.

This long-term follow up study demonstrates that for 60 months after heart transplantation, the total  $\beta$ -adrenoceptor density was not significantly reduced. On the other hand, the  $\beta_1$ : $\beta_2$ -adrenoceptor ratio was surprisingly shifted with increasing time after transplantation, from about 80:20 to 60:40%, which was due to a decrease in  $\beta_1$ - and an increase in  $\beta_2$ -adrenoceptors. Compared with controls, substantial intergroup difference in either the total  $\beta$ -adrenoceptor density or in the  $\beta_1$ - and  $\beta_2$ -subtype distribution was not observed between biopsies taken 48–60 months after cardiac transplantation from patients with previous end-stage dilated cardiomyopathy and previous severe ischemic heart disease (table 1). The equilibrium dissociation constant was similar in all groups investigated ( $12.6 \pm 2.3$ – $18.7 \pm 2.8$  pM).

The surgically denervated, transplanted human heart very likely does not develop supersensitivity to  $\beta$ -adrenergic stimulation due to an increase in total  $\beta$ -adrenoceptor number. Our hypothesis is that up-regulation of the  $\beta_2$ -adrenoceptor subtype in these hearts could be due to an increased functional importance of circulating catecholamines (epinephrine) in modulating positive inotropic and chronotropic effects. Epinephrine is known to be a nonselective  $\beta$ -adrenoceptor agonist with similar affinities to  $\beta_1$ - and  $\beta_2$ -adrenoceptors, whereas norepinephrine is a rather  $\beta_1$ -selective agonist.<sup>9</sup> Optimal inotropic support is of fundamental importance in the denervated human heart in which systolic function is compromised, *e.g.*, in early postoperative settings or in cases of chronic rejection (nonspecific myocardial allograft failure). The change in  $\beta_1$ : $\beta_2$ -adrenoceptor subtype distribution could have clinical consequences because it is conceivable that with increasing time after transplantation nonselective  $\beta$ -agonists (epinephrine or isoproterenol) may provide better inotropic support than  $\beta_1$ -selective agents (nor-

TABLE 1. Total  $\beta$ -Adrenoceptor Density and  $\beta_1$ - and  $\beta_2$ -Subtype Distribution

| Reason for Transplantation                                        | Time after Transplantation (months) | $B_{max}$ (fmol/mg protein) | $\beta_1$ (fmol/mg protein) | $\beta_2$ (fmol/mg protein) | $\beta_1$ (%)  | n  |
|-------------------------------------------------------------------|-------------------------------------|-----------------------------|-----------------------------|-----------------------------|----------------|----|
| End-stage dilated cardiomyopathy or severe ischemic heart disease | Control                             | 70.8 $\pm$ 7.1              | 56.6 $\pm$ 4.2              | 14.2 $\pm$ 2.4              | 80             | 8  |
|                                                                   | 1-3                                 | 66.6 $\pm$ 7.2              | 50.4 $\pm$ 5.6              | 16.2 $\pm$ 3.1              | 76             | 15 |
|                                                                   | 4-7                                 | 72.1 $\pm$ 6.2              | 55.7 $\pm$ 5.1              | 16.4 $\pm$ 2.0              | 77             | 15 |
|                                                                   | 8-11                                | 68.2 $\pm$ 8.5              | 49.2 $\pm$ 3.8              | 19.0 $\pm$ 3.4              | 72             | 6  |
|                                                                   | 12                                  | 71.1 $\pm$ 5.8              | 47.1 $\pm$ 4.3              | 24.0 $\pm$ 2.1*             | 66*            | 15 |
|                                                                   | 24                                  | 65.2 $\pm$ 6.3              | 40.5 $\pm$ 3.6*             | 24.7 $\pm$ 2.9*             | 62*            | 15 |
|                                                                   | 36                                  | 65.4 $\pm$ 7.0              | 41.7 $\pm$ 4.6*             | 23.7 $\pm$ 3.1*             | 64*            | 12 |
|                                                                   | 48                                  | 59.3 $\pm$ 4.7              | 35.5 $\pm$ 3.0*             | 23.8 $\pm$ 2.5*             | 60*            | 12 |
|                                                                   | 60                                  | 55.8 $\pm$ 4.2              | 33.9 $\pm$ 2.8*             | 21.9 $\pm$ 2.3*             | 61*            | 10 |
|                                                                   | End-stage dilated cardiomyopathy    | 1-12                        | 70.3 $\pm$ 4.6              | 52.7 $\pm$ 3.7              | 17.6 $\pm$ 1.8 | 75 |
| 24-36                                                             |                                     | 69.9 $\pm$ 5.0              | 43.4 $\pm$ 3.6*             | 26.5 $\pm$ 2.6*             | 62             | 20 |
| 48-60                                                             |                                     | 55.9 $\pm$ 3.9              | 32.6 $\pm$ 2.1*             | 23.7 $\pm$ 1.3*             | 59*            | 16 |
| Severe ischemic heart disease                                     | 1-12                                | 63.8 $\pm$ 5.1              | 45.7 $\pm$ 4.3              | 18.1 $\pm$ 1.7              | 71             | 21 |
|                                                                   | 24-36                               | 53.9 $\pm$ 9.6              | 34.5 $\pm$ 6.6*             | 19.4 $\pm$ 4.6              | 66*            | 7  |
|                                                                   | 48-60                               | 58.4 $\pm$ 6.7              | 37.0 $\pm$ 5.0*             | 21.4 $\pm$ 2.2*             | 65*            | 7  |

Total  $\beta$ -adrenoceptor density ( $B_{max}$ ) and  $\beta_1$ - and  $\beta_2$ -subtype distribution in absolute values (fmol of ICYP specifically bound per mg protein) as well as  $\beta_1$ -subtype population expressed as percentage of total  $\beta$ -adrenoceptor density in right ventricular biopsies from transplant donors serving as controls and patients after heart transplantation because of end-stage dilated cardiomyopathy or severe ischemic heart disease and in relation to the pretransplantation disease.

\*  $P < 0.05$  versus control.

epinephrine) which might, due to the decreased  $\beta_1$ -adrenoceptor population, have reduced positive inotropic effects at doses that can be administered clinically.

MARKUS STEINFATH, M.D.  
Staff Anesthesiologist

WILHELM SCHMITZ, M.D.  
Professor of Pharmacology

HASSO SCHOLZ, M.D.  
Professor of Pharmacology

Departments of Anesthesiology and Pharmacology  
University Hospital Eppendorf  
Martinistrasse 52  
D-2000 Hamburg 20, Germany

HEIKO VON DER LEYEN, M.D.  
Staff Cardiologist

ANDREAS HECHT  
AXEL HAVERICH, M.D.  
Staff Surgeon

BERND HEUBLEIN, M.D.  
Professor of Cardiology

Departments of Cardiology and Cardiothoracic  
and Vascular Surgery  
Hannover School of Medicine  
Konstanty-Gutschow-Strasse 8  
D-3000 Hannover 61, Germany

## REFERENCES

1. Brodde OE:  $\beta_1$ - and  $\beta_2$ -adrenoceptors in the human heart: properties, function, and alterations in chronic heart failure. *Pharmacol Rev* 43:203-242, 1991
2. Regitz V, Bossaller C, Strasser R, Schüler S, Hetzer R, Fleck E: Myocardial catecholamine content after heart transplantation. *Circulation* 82:620-623, 1990
3. Rowan RA, Billingham ME: Myocardial innervation in long term heart transplant survivors: A quantitative ultrastructural survey. *J Heart Transplant* 7:448-452, 1988
4. Yusuf S, Theodoropoulos S, Mathias CJ, Dhalla N, Wittes J, Mitchell A, Yacoub M: Increased sensitivity of the denervated transplanted human heart to isoprenaline both before and after  $\beta$ -adrenergic blockade. *Circulation* 71:696-704, 1987
5. Kemnitz J, Cohnert T, Schäfers HJ, Helmke M, Wahlers T, Hermann G, Schmidt M, Haverich A: A classification of cardiac allograft rejection: A modification of the classification by Billingham. *Am J Surg Pathol* 11:503-515, 1987
6. Steinfath M, Geertz B, Schmitz W, Scholz H, Haverich A, Breil I, Hanrath P, Reupcke C, Sigmund M, Lo HB: Distinct down-regulation of cardiac  $\beta_1$ - and  $\beta_2$ -adrenoceptors in different human heart diseases. *Naunyn Schmiedebergs Arch Pharmacol* 343:217-220, 1991
7. Bradford MM: A rapid and sensitive method for the quantitation of microgram quantities of protein utilizing the principle of protein-dye binding. *Anal Biochem* 72:248-254, 1976
8. Scatchard G: The attraction of proteins for small molecules and ions. *Ann NY Acad Sci* 51:660-672, 1949
9. Lands AM, Arnold A, McAuliff JP, Luduena FP, Brown TG: Differentiation of receptor systems activated by sympathomimetic amines. *Nature* 214:597-598, 1967

(Accepted for publication January 27, 1992.)
